# Supplementary material
Source: PubMed Central journal article supplement (PMC2980941)
Supplement: supp_kqq110_kqq110table1.pdf [file supp_kqq110_kqq110table1.pdf]

**Table 1.** Baseline characteristics by follow-up status within the GROW study cohort ( $N = 664$ )

| Characteristic                               | All subjects, $N = 664$<br>$n$ (%) | Follow-up status                    |                                        |                         |
|----------------------------------------------|------------------------------------|-------------------------------------|----------------------------------------|-------------------------|
|                                              |                                    | Reinterviewed, $N = 582$<br>$n$ (%) | Not reinterviewed, $N = 82$<br>$n$ (%) | $P$ -value <sup>a</sup> |
| Injury status                                |                                    |                                     |                                        | NS                      |
| Injured case                                 | 166 (25)                           | 144 (25)                            | 22 (27)                                |                         |
| Referent                                     | 498 (75)                           | 438 (75)                            | 60 (73)                                |                         |
| Injury type (cases and referents)            |                                    |                                     |                                        | NS                      |
| UE                                           | 296 (45)                           | 256 (44)                            | 40 (49)                                |                         |
| Neck                                         | 72 (11)                            | 61 (11)                             | 11 (13)                                |                         |
| Back                                         | 200 (30)                           | 177 (30)                            | 23 (28)                                |                         |
| Lower extremity                              | 96 (15)                            | 88 (15)                             | 8 (10)                                 |                         |
| Study site                                   |                                    |                                     |                                        | NS                      |
| Site 1                                       | 332 (50)                           | 285 (49)                            | 47 (57)                                |                         |
| Site 2                                       | 332 (50)                           | 297 (51)                            | 35 (43)                                |                         |
| Female gender                                | 480 (72)                           | 427 (73)                            | 53 (65)                                | NS                      |
| Race/ethnicity                               |                                    |                                     |                                        | <0.001                  |
| White                                        | 260 (39)                           | 245 (42)                            | 15 (18)                                |                         |
| Latino                                       | 105 (16)                           | 93 (16)                             | 12 (15)                                |                         |
| Asian/Pacific Islander                       | 185 (28)                           | 149 (26)                            | 36 (44)                                |                         |
| African American                             | 66 (10)                            | 55 (10)                             | 11 (13)                                |                         |
| Other                                        | 48 (7)                             | 40 (6)                              | 8 (10)                                 |                         |
| Educational level <sup>b</sup>               |                                    |                                     |                                        | <0.001                  |
| No college degree                            | 116 (18)                           | 85 (15)                             | 31 (38)                                |                         |
| Associate degree                             | 156 (24)                           | 138 (24)                            | 18 (22)                                |                         |
| Bachelor degree                              | 266 (40)                           | 241 (41)                            | 25 (30)                                |                         |
| Postgraduate degree                          | 126 (19)                           | 118 (20)                            | 8 (10)                                 |                         |
| Annual family income in dollars <sup>b</sup> |                                    |                                     |                                        | <0.01                   |
| ≤\$40 000                                    | 90 (14)                            | 73 (13)                             | 16 (20)                                |                         |
| >\$40 000–80 000                             | 288 (43)                           | 248 (43)                            | 40 (49)                                |                         |
| >\$80 000–120 000                            | 187 (28)                           | 168 (29)                            | 19 (23)                                |                         |
| >\$120 000                                   | 100 (15)                           | 93 (16)                             | 7 (8)                                  |                         |
| Co-morbid conditions                         |                                    |                                     |                                        |                         |
| Hypertension                                 | 152 (23)                           | 135 (23)                            | 17 (21)                                | NS                      |
| Asthma                                       | 91 (14)                            | 82 (14)                             | 9 (11)                                 | NS                      |
| Diabetes                                     | 36 (5)                             | 31 (5)                              | 5 (6)                                  | NS                      |
| Cigarette smoking status                     |                                    |                                     |                                        | NS                      |
| Never                                        | 404 (61)                           | 348 (60)                            | 56 (68)                                |                         |
| Former                                       | 188 (28)                           | 172 (30)                            | 16 (20)                                |                         |
| Current                                      | 72 (11)                            | 62 (11)                             | 10 (12)                                |                         |
| Job group                                    |                                    |                                     |                                        | <0.01                   |
| Administrators/professional                  | 74 (11)                            | 66 (11)                             | 8 (10)                                 |                         |
| Nurses                                       | 246 (37)                           | 228 (39)                            | 18 (22)                                |                         |
| Other clinical                               | 93 (14)                            | 83 (14)                             | 10 (12)                                |                         |
| Technical                                    | 57 (9)                             | 47 (8)                              | 10 (12)                                |                         |
| Clerical                                     | 139 (21)                           | 115 (20)                            | 24 (29)                                |                         |
| Support                                      | 55 (8)                             | 43 (7)                              | 12 (15)                                |                         |
| Age in years, mean $\pm$ SD                  | 45 $\pm$ 10.2                      | 46 $\pm$ 10.1                       | 44 $\pm$ 11.1                          | NS                      |

<sup>a</sup>Age by independent samples  $t$ -test; educational level and annual family income by Mantel–Haenszel  $\chi^2$ ; all others by  $\chi^2$  test.<sup>b</sup>Category  $N$ 's for these multiple-imputed variables may not equal the total due to rounding.
