# Supplementary material
Source: PubMed Central journal article supplement (PMC2980941)
Supplement: supp_kqq110_kqq110table3.pdf [file supp_kqq110_kqq110table3.pdf]

**Table 3.** Univariate predictors of poor functioning at follow-up within the GROW Study Cohort

| Characteristic                    | Lowest quartile, SF-12 PCS ( <i>N</i> = 664) |                 | Lowest quartile work effectiveness ( <i>N</i> = 621) |                 | 2+ lost workdays in past 4 weeks ( <i>N</i> = 621) |                 | Changed site or not working ( <i>N</i> = 664) |                 |
|-----------------------------------|----------------------------------------------|-----------------|------------------------------------------------------|-----------------|----------------------------------------------------|-----------------|-----------------------------------------------|-----------------|
|                                   | OR                                           | <i>P</i> -value | OR                                                   | <i>P</i> -value | OR                                                 | <i>P</i> -value | OR                                            | <i>P</i> -value |
| Age at follow-up (per 10 years)   | 1.4                                          | <0.001          | 1.0                                                  | NS              | 0.9                                                | NS              | 0.9                                           | NS              |
| Female                            | 1.3                                          | NS              | 1.3                                                  | NS              | 1.2                                                | NS              | 0.8                                           | NS              |
| Race/ethnicity                    |                                              |                 |                                                      |                 |                                                    |                 |                                               |                 |
| Latino                            | 1.0                                          | NS              | 0.8                                                  | NS              | 1.2                                                | NS              | 0.9                                           | NS              |
| Asian/Pacific Islander            | 0.9                                          | NS              | 0.8                                                  | NS              | 1.1                                                | NS              | 1.1                                           | NS              |
| African American                  | 1.8                                          | NS              | 1.0                                                  | NS              | 1.8                                                | NS              | 1.3                                           | NS              |
| Other                             | 1.3                                          | NS              | 0.9                                                  | NS              | 1.1                                                | NS              | 2.2                                           | <0.05           |
| White (ref)                       | 1.0                                          | –               | 1.0                                                  | –               | 1.0                                                | –               | 1.0                                           | –               |
| SES quintile                      |                                              |                 |                                                      |                 |                                                    |                 |                                               |                 |
| 1 (scores 2–3)                    | 2.2                                          | <0.01           | 1.0                                                  | NS              | 1.7                                                | NS              | 2.4                                           | <0.05           |
| 2 (score 4)                       | 1.3                                          | NS              | 1.7                                                  | NS              | 1.6                                                | NS              | 1.5                                           | NS              |
| 3 (score 5)                       | 1.5                                          | NS              | 1.4                                                  | NS              | 1.5                                                | NS              | 1.4                                           | NS              |
| 4 (score 6)                       | 1.8                                          | NS              | 1.8                                                  | NS              | 1.4                                                | NS              | 1.1                                           | NS              |
| 5 (scores 7–8) (ref)              | 1.0                                          | –               | 1.0                                                  | –               | 1.0                                                | –               | 1.0                                           | –               |
| Co-morbid hypertension            | 1.9                                          | <0.01           | 1.4                                                  | NS              | 1.2                                                | NS              | 0.8                                           | NS              |
| Co-morbid asthma                  | 1.4                                          | NS              | 1.2                                                  | NS              | 0.9                                                | NS              | 0.7                                           | NS              |
| Co-morbid diabetes                | 2.7                                          | <0.01           | 0.6                                                  | NS              | 0.8                                                | NS              | 1.9                                           | NS              |
| Smoking status                    |                                              |                 |                                                      |                 |                                                    |                 |                                               |                 |
| Former                            | 1.1                                          | NS              | 1.1                                                  | NS              | 1.5                                                | NS              | 1.0                                           | NS              |
| Current                           | 1.3                                          | NS              | 1.2                                                  | NS              | 1.7                                                | NS              | 1.3                                           | NS              |
| Never (ref)                       | 1.0                                          | –               | 1.0                                                  | –               | 1.0                                                | –               | 1.0                                           | –               |
| Job group <sup>a</sup>            |                                              |                 |                                                      |                 |                                                    |                 |                                               |                 |
| Nurses                            | 0.8                                          | NS              | 1.5                                                  | NS              | 0.7                                                | NS              | 0.9                                           | NS              |
| Other clinical                    | 1.0                                          | NS              | 1.3                                                  | NS              | 1.1                                                | NS              | 0.8                                           | NS              |
| Technical                         | 0.4                                          | NS              | 1.3                                                  | NS              | 0.6                                                | NS              | 0.5                                           | NS              |
| Clerical                          | 1.3                                          | NS              | 1.3                                                  | NS              | 1.3                                                | NS              | 0.8                                           | NS              |
| Support                           | 1.1                                          | NS              | 0.9                                                  | NS              | 0.9                                                | NS              | 1.3                                           | NS              |
| Administrators/professional (ref) | 1.0                                          | –               | 1.0                                                  | –               | 1.0                                                | –               | 1.0                                           | –               |
| Effort–reward ratio <sup>b</sup>  | 2.2                                          | <0.01           | 4.2                                                  | <0.001          | 1.4                                                | NS              | 0.9                                           | NS              |
| Job strain score <sup>b</sup>     | 5.1                                          | <0.05           | 13.3                                                 | <0.001          | 1.1                                                | NS              | 2.8                                           | NS              |
| Job strain/ERI ratio only         |                                              |                 |                                                      |                 |                                                    |                 |                                               |                 |
| Above median: ERI                 | 0.8                                          | NS              | 1.2                                                  | NS              | 0.8                                                | NS              | 0.9                                           | NS              |
| Above median: job strain only     | 1.5                                          | NS              | 1.2                                                  | NS              | 1.1                                                | NS              | 1.5                                           | NS              |
| Above median: both                | 1.7                                          | <0.05           | 2.5                                                  | <0.001          | 1.0                                                | NS              | 1.3                                           | NS              |
| Above median: neither (ref)       | 1.0                                          | –               | 1.0                                                  | –               | 1.0                                                | –               | 1.0                                           | –               |

SES quintile: SES, created by adding together one point each for higher levels of education and income shown in supplementary Table 1 and grouping into quintiles, from lowest (1) to highest (5). Job strain/effort–reward ratio created by recoding each variable into above median (binary) equivalent and then testing each simultaneously to yield four categories.

<sup>a</sup>Analysis excludes job-matched referents.

<sup>b</sup>OR expressed per SD difference in observed predicted variable.
